# Supplementary material for: The role of the desmosomal protein desmocollin 2 in tumour progression in triple negative breast cancer patients
Source: Cancer Cell Int. 2023 Mar 16;23:47. doi: 10.1186/s12935-023-02896-9 (PMC10018948; doi:10.1186/s12935-023-02896-9)
Supplement: Supplementary file 2 — Additional file 2: Table S1. Patient characteristics Microarray and Western Blot cohorts. [file 12935_2023_2896_MOESM2_ESM.xlsx]

## Sheet: Table 1
Table S1: Patient characteristics
	Hamburg Microarray Cohort n=197	Hamburg WesternBlot Cohort n= 111
	n (%)	n (%)
Age (years)
Median	56.6	56.2
Range	29-94	29-79
Histological Type
Ductal	140 (71)	75(68)
Lobular	31 (16)	19 (17)
Others	22 (11)	13 (12)
Unknown	4 (2)	2 (2)
Tumor Size (stage)
< 2cm (pT1)	51 (26)	24 (12)
2-5cm (pT2)	121 (61)	72 (37)
> 5cm (pT3-4)	20 (10)	11 (6)
Unknown	5 (3)	4 (2)
Grade
I	20 (10)	7 (6)
II	80 (41)	47 (42)
III-Undifferentiated	92 (47)	53 (48)
Unknown	5 (3)	4 (4)
Lymph Nodes
Negative nodes	136 (69)	70 (63)
Positive nodes	60 (31)	39 (35)
Unknown	1 (0.5)	2 (2)
ER Status
Positive	148 (75)	81 (73)
Negative	41 (21)	25 (22)
Unknown	8 (4)	5 (5)
PR Status
Positive	124 (63)	69 (62)
Negative	65 (33)	37 (33)
Unknown	8 (4)	5 (5)
Molecular Subtyp
Luminal	123 (63)	58 (52)
HER2 +	29 (15)	23 (21)
TN	37 (19)	25 (22)
Unknown	8 (4)	5 (5)
Distant metastases
All distant metastases	55 (28)	41 (37)
No distant metastases	120 (61)	53 (48)
Unknown	22 (11)	8 (7)
Bone metastases1	34 (17)	23 (21)
Lung metastases1	28 (14)	23 (21)
Visceral/hepatic metastases1	30 (15)	25 (22)
Brain metastases1	15 (8)	12 (11)
Follow-up
Recurrence	72 (37)	51 (46)
No recurrence	105 (53)	52 (47)
Recurence unknown	20 (10)	8 (7)
Died of disease	56 (28)	41 (37)
Died of other course	8 (4)	7 (6)
Alive	126 (64)	60 (54)
Unknown	7 (4)	3 (3)
Median follow-up period (months)	133	142
1: multiples included
