# Supplementary material for: The role of the desmosomal protein desmocollin 2 in tumour progression in triple negative breast cancer patients
Source: Cancer Cell Int. 2023 Mar 16;23:47. doi: 10.1186/s12935-023-02896-9 (PMC10018948; doi:10.1186/s12935-023-02896-9)
Supplement: Supplementary file 3 — Additional file 3: Table S2: Patient characteristics TMAs. [file 12935_2023_2896_MOESM3_ESM.xlsx]

## Sheet: Tabelle1
Table S2: Patient characteristics TMAs
	W18.4062	W18.4025	W18.4026	W18.4023
	*n= 105	*n = 47	*n = 58	*n = 16
Tumor Size (stage)
< 2cm (pT1)	25	17	19	5
2-5cm (pT2)	56	26	31	10
> 5cm (pT3-4)	16	3	7	1
Unknown	8	1	1	0
Grade
I			1
II			8
III-Undifferentiated			45
Unknown			4
Lymph Nodes
Negative nodes	56	16	24	6
Positive nodes	37	25	21	10
Unknown	12	6	13	0
ER Status
Positive	40	26		12
Negative	24	21		0
Unknown	41	0		4
PR Status
Positive	40	20		12
Negative	24	27		0
Unknown	41	0		4
Molecular Subtyp
Luminal			2	12
HR+/HER2+	40	26	0	0
HER2 +		16	2	0
TN	24	4	44	0
Unknown	41	11	10	4
Follow-up
Recurrence	25	6	20	16
No recurrence	61	13	26	0
Recurence unknown	21	28	12	0
Died of disease	12	2	13	8
Alive	68	19	33	8
Unknown	27	26	12	0
Median follow-up period (months)	24.5	57	44	85.5
* analysable biopsies from primary breast cancer samples
